# Supplementary material for: NLRP3 Inflammasome Involved with Viral Replication in Cytopathic NADL BVDV Infection and IFI16 Inflammasome Connected with IL-1β Release in Non-Cytopathic NY-1 BVDV Infection in Bovine Macrophages
Source: MDPI journal article supplement (doi:10.3390/v15071494), 2023-06-30
Supplement: s1 [file s1]

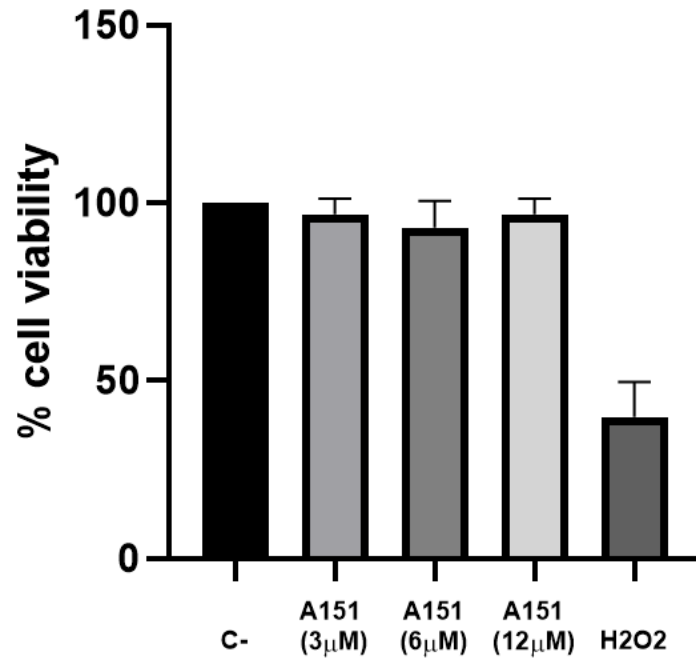

**Supplementary Figure S1.** Cell viability of bovine macrophages incubated with different concentration of ODN A151 inhibitor (5'-TTAGGGTTAGGGTTAGGGTTAGGG-3') (3µM, 6µM and 12µM). Negative control: Bovine macrophages cultures with RPMI 10%FBS. Positive control: Bovine macrophages incubated with hydrogen peroxide.
